# Supplementary material
Source: PubMed Central journal article supplement (PMC3318604)

## **Supplemental Figure Legends.**

**Figure S1. Representative ICS staining of BAL and rectal tissue.** Gating and staining for individual cytokines with no stimulation (NS) or with Env peptide stimulation (Env) are shown.

**Figure S2. Evidence of infection with one or two variants following low-dose rectal challenge.** Phylogenetic tree of viral inoculum (black) and sequences from each control animal (colored) representing full-length *env* sequences obtained by SGA at day 7 (d7) or day 14 (d14) post challenge. For 8 out of 9 animals only a single viral lineage was identified. For animal G402 (green), there are two distinct viral lineages as well as evidence of viral recombination.

**Figure S3. Kaplan-Meier curves illustrating percent uninfected macaques versus number of SIV<sub>mac251</sub> challenges for individual immunization groups and controls.**

(A) Representative ICS data from BAL at wk28 (animal G408, IN/IT)

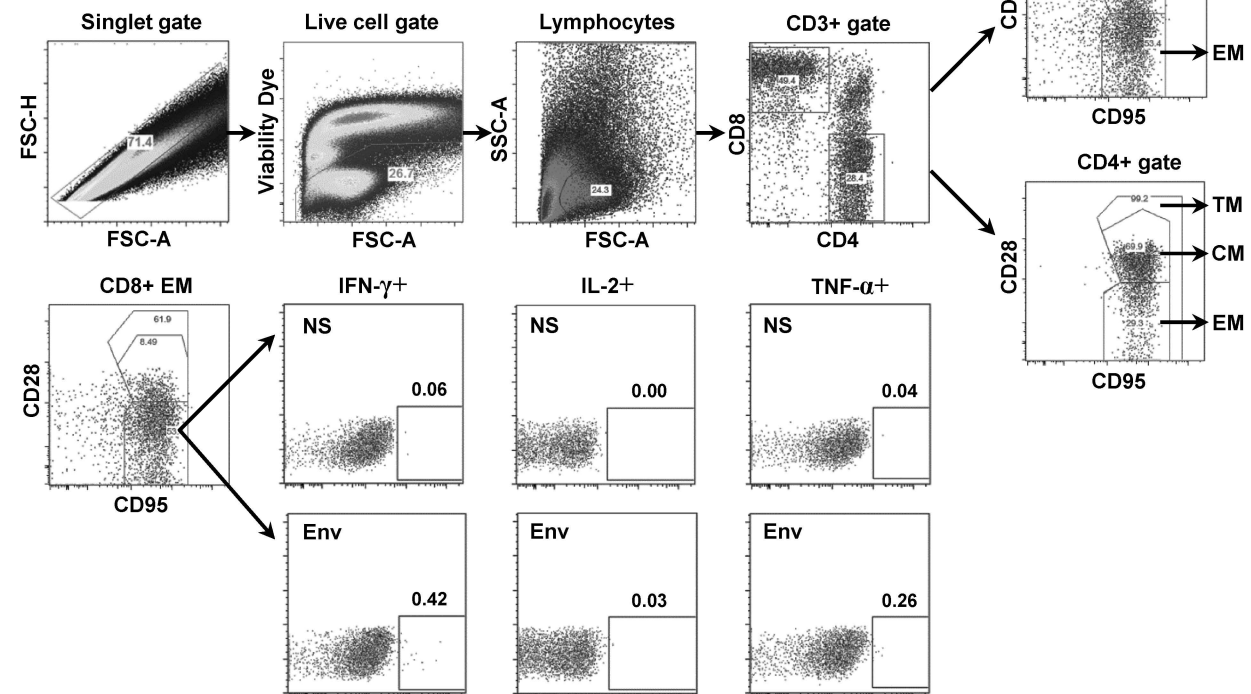

(B) Representative ICS data from Rectal sample at wk28 (animal G401, IR)

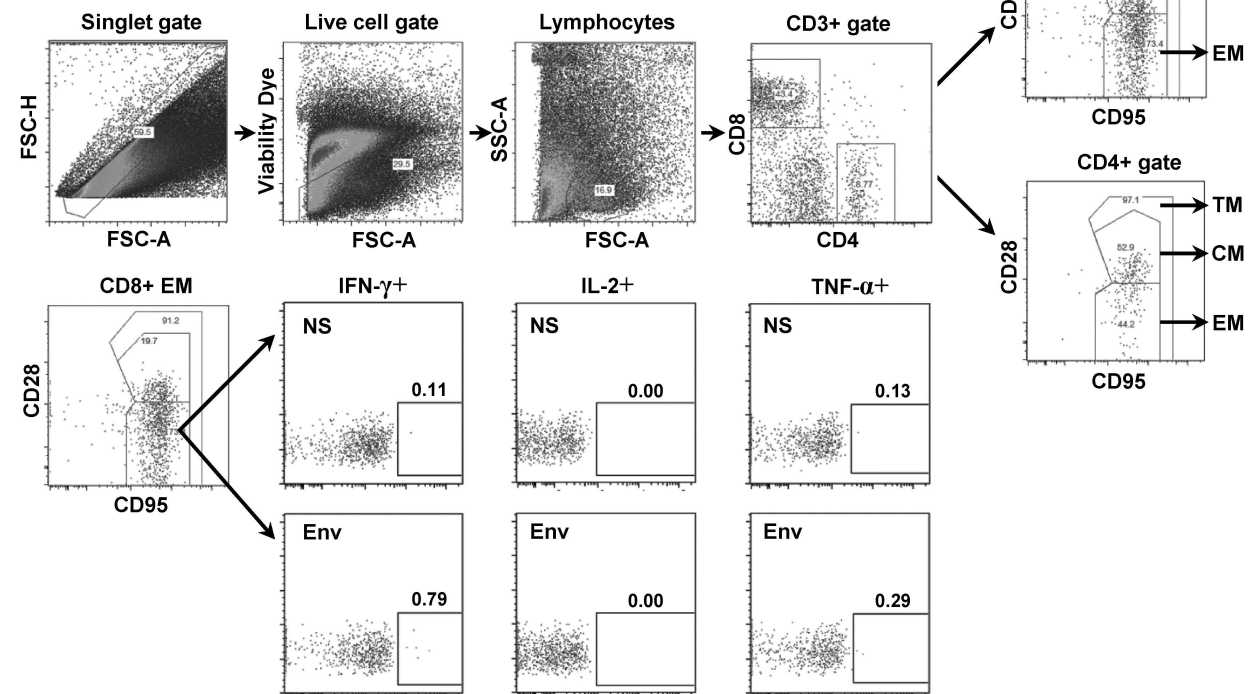

1:500 i.r.

0.002

G419 d14 1/1

G423 d7 1/1

G402 d14 1/2

Recombinants

G421 d7 1/1

G420 d14 1/1

G411 d7 1/1

G402 d14 2/2

G428 d14 1/1

G417 d7 1/1

G422 d7 1/1

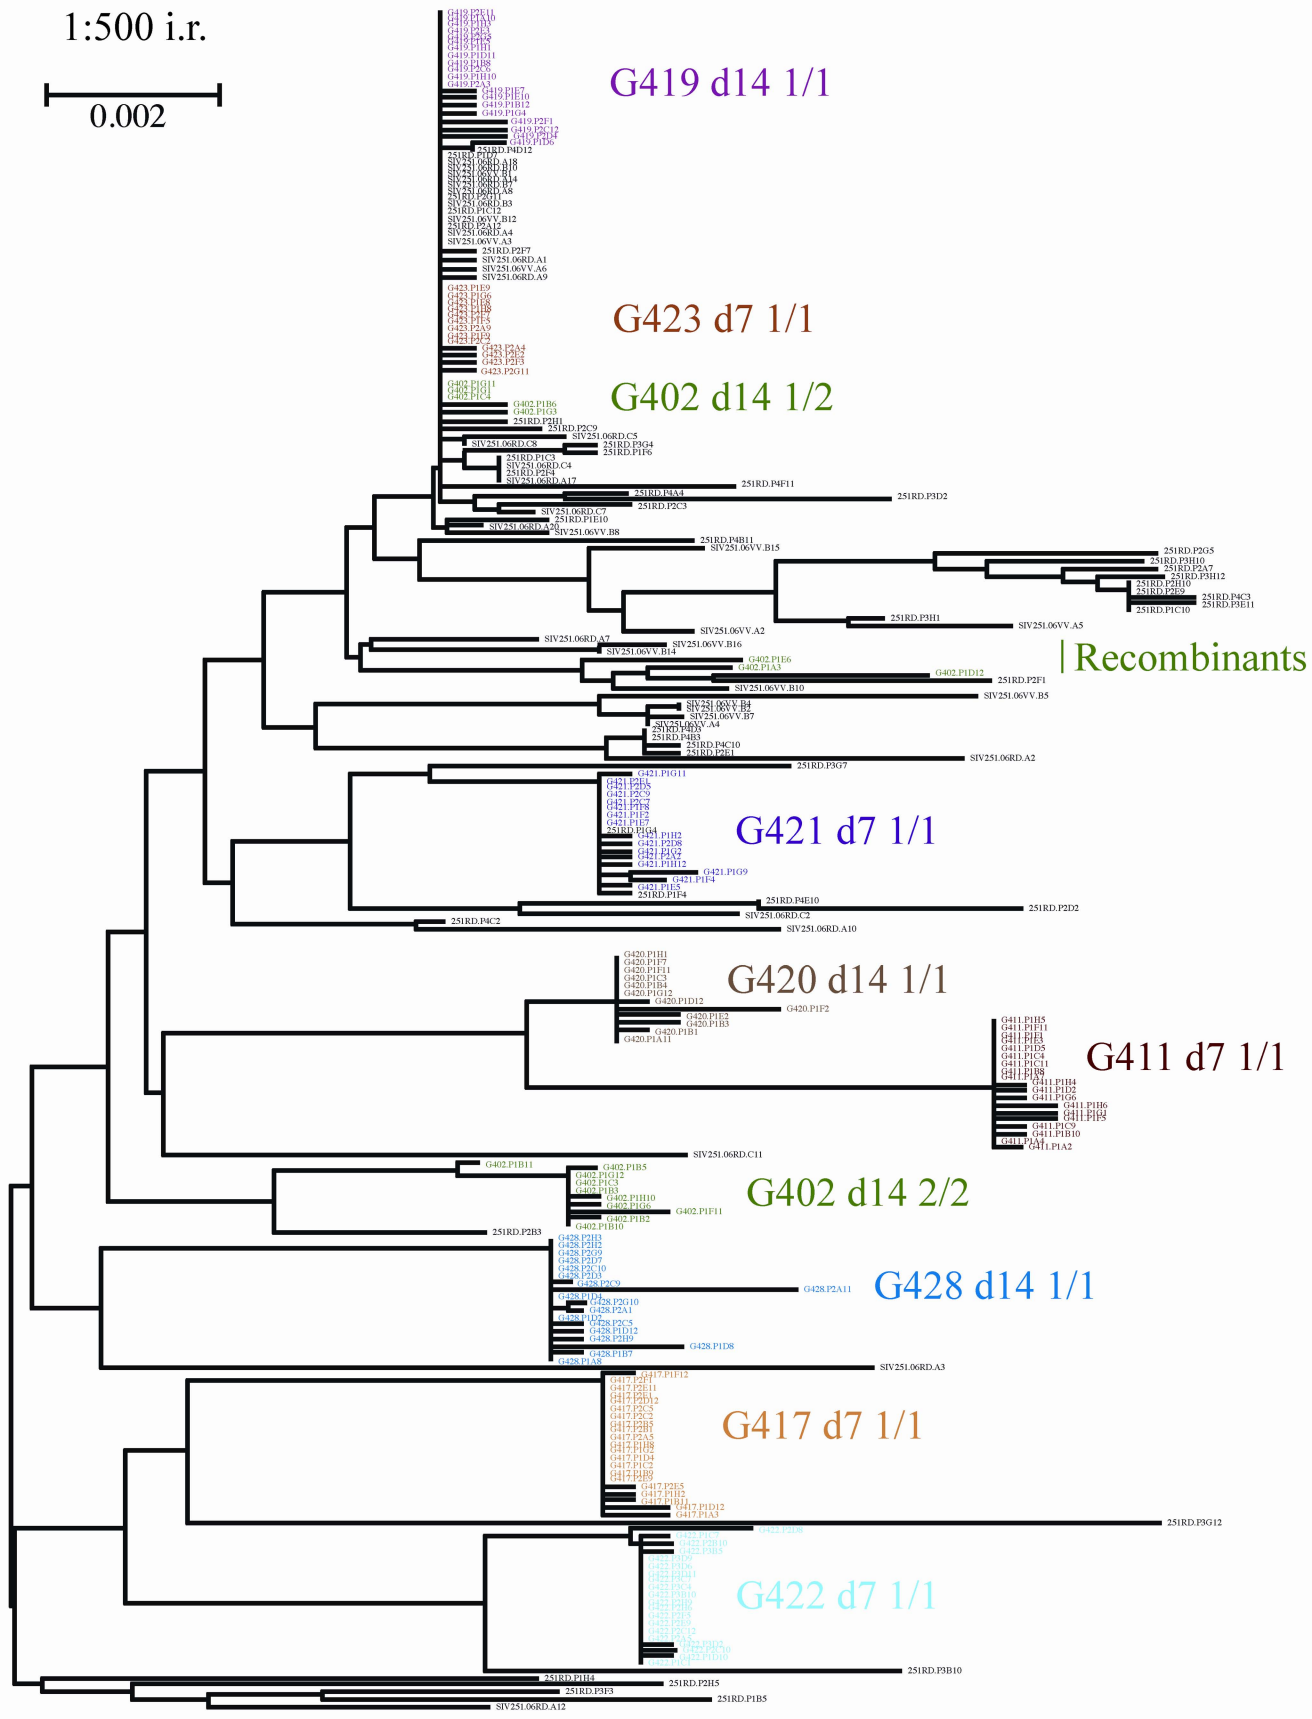

**A.**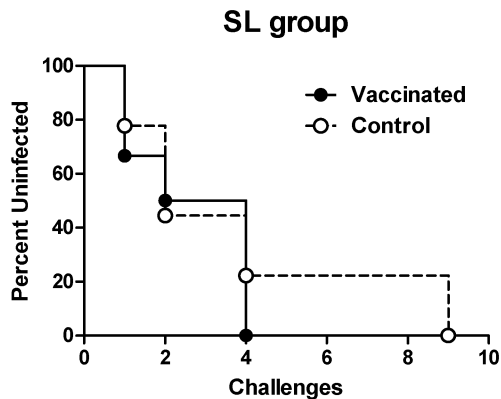**B.**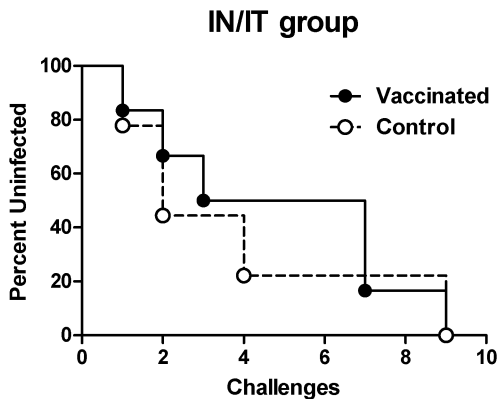**C.**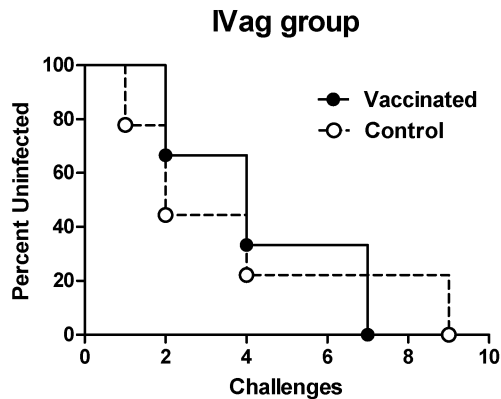**D.**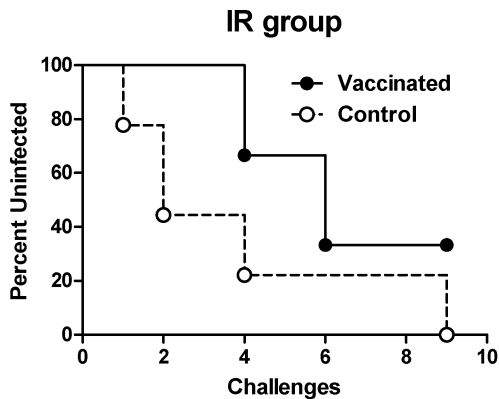

Supplement: supp_86.8.4644_FigS1-S3.pdf [file supp_86.8.4644_FigS1-S3.pdf]
